# Supplementary material for: Aggrecan and chondroitin-6-sulfate abnormalities in schizophrenia and bipolar disorder: a postmortem study on the amygdala
Source: PubMed Central journal article supplement — Transl Psychiatry. 2015 Jan 20;5(1):e496–. doi: 10.1038/tp.2014.128 (PMC4312825; doi:10.1038/tp.2014.128), 2015-01-20
Supplement: tp2014128x3.pdf [file tp2014128x3.pdf]

**Supplementary Table 1. Sample Demographic and Descriptive Characteristics of the cohort used for immunohistochemical investigation**

| case                                                  | marker     | Cause of death/<br>Inflammation              | brain<br>weight (g) | PMI (h)      | Hemisphere |
|-------------------------------------------------------|------------|----------------------------------------------|---------------------|--------------|------------|
| <b>SCHIZOPHRENIA</b>                                  |            |                                              |                     |              |            |
| 4375/31/M                                             | A          | unknown                                      | 1450                | 15.0         | L          |
| 4496/49/M                                             | A          | Suicide (A, N)                               | 1440                | 19.1         | R          |
| 4548/82/F                                             | A          | Cancer (C, N)                                | 1110                | 23.9         | L          |
| 4544/32/M                                             | A          | Cardiac Arrest and<br>pancreatitis (A, I)    | 1400                | 7.8          | L          |
| 4702/55/M                                             | A          | Cardiac arrest (A, N)                        | 1380                | 21.4         | L          |
| 4707/60/F                                             | A          | Cancer (C, N)                                | 1220                | 19.6         | R          |
| 4907/73/F                                             | A          | Cancer (C, N)                                | 1170                | 24.1         | L          |
| 4942/61/F                                             | A          | Pneumonia (A, I)                             | 1200                | 14.08        | L          |
| 5038/93/F                                             | 3B3/CS56   | Pneumonia (A, I)                             | 970                 | 17.4         | L          |
| 5100/72/F                                             | A          | Renal Failure (C, N)                         | 1065                | 21.75        | L          |
| 5158/56/F                                             | 3B3/CS56   | Cancer (C, N)                                | 1185                | 18.7         | R          |
| 5656/73/F                                             | A/CS56     | Cancer (C, N)                                | 1130                | 28.8         | R          |
| 5785/62/M                                             | A/3B3/CS56 | Sepsis (C, I)                                | 1340                | 25.3         | L          |
| 5787/36/M                                             | 3B3/CS56   | unknown                                      | 1480                | 17.97        | R          |
| 5920/58/M                                             | A/3B3/CS56 | COPD (C, N)                                  | 1160                | 32.38        | R          |
| 6013/65/M                                             | 3B3/CS56   | Cardiac arrest (A, N)                        | 1255                | 21.4         | R          |
| 6987/45/M                                             | 3B3/CS56   | Cardiac arrest and colitis at<br>t.d. (C, I) | 1540                | 8.5          | L          |
| 6993/55/F                                             | 3B3/CS56   | Cardiac arrest (A, N)                        | 1240                | 17.1         | R (PCR), L |
| <b>COPD and temporal arteritis<br/>at t.d. (C, I)</b> |            |                                              |                     |              |            |
| 7056/65/F                                             | 3B3/CS56   |                                              | 1160                | 30.3         | L          |
| 7284/45/F                                             | 3B3/CS56   | Cancer (C, N)                                | 1460                | 12.4         | L          |
| 7191/65/F                                             | 3B3/CS56   | Pneumonia (A, I)                             | 1200                | 18.5         | R          |
| 7454/60/M                                             | 3B3/CS56   | ASCVD (C, N)                                 | 1265                | 22.2         | R          |
| 7817/79/F                                             | CS56       | Respiratory failure (A, N)                   | 1065                | 8.03         | R          |
| 8006/58/F                                             | 3B3        | Myocardial infarction (A, N)                 | 1310                | 20.9         | L          |
| Total/mean ±<br>SD                                    |            |                                              |                     |              |            |
| 59.5±15.3, 14<br>F/10 M                               |            |                                              | 1258.1±15<br>0.5    | 19.4±6.<br>5 | 14 L/10 R  |
| <b>BIPOLAR DISORDER</b>                               |            |                                              |                     |              |            |
| 4403/76/F                                             | A          | Cardiac arrest (A, N)                        | 1170                | 22.8         | R          |
| 4545/73/M                                             | A          | Pneumonia (A, I)                             | 1190                | 7.2          | R          |
| 4661/25/M                                             | A          | Pulmonary edema (A, N)                       | 1480                | 12.56        | R          |
| 4665/66/M                                             | A          | Pneumonia (C, I)                             | 1480                | 17.4         | R          |
| 4928/75/F                                             | A          | unknown                                      | 1310                | 36.01        | R          |
| 4961/74/M                                             | CS56       | Pneumonia (C, I)                             | 1340                | 14.3         | R          |
| 5044/73/F                                             | A/CS56     | Cancer (C, N)                                | 1020                | 17.0         | L          |
| 5265/83/M                                             | A          | unknown                                      | 860                 | 17.5         | L          |
| 7331/61/F                                             | 3B3/CS56   | Cancer (C, N)                                | 1195                | 16.6         | L          |
| 5431/40/F                                             | A/3B3/CS56 | Sepsis (C, I)                                | 1340                | 21.92        | L          |
| 5802/51/F                                             | 3B3        | Ischemic heart disease (A, N)                | 1260                | 35.1         | L          |
| 4518/86/F                                             | A          | unknown                                      | 1040                | 11.3         | -          |
| 4914/73/F                                             | A          | Sepsis (C, I)                                | 1060                | 20.8         | L          |
| 4464/74/M                                             | A          | Pneumonia (A, I)                             | 1270                | 24.8         | L          |

|                            |            |                                 |                    |                |               |
|----------------------------|------------|---------------------------------|--------------------|----------------|---------------|
| 5357/62/F                  | 3B3/CS56   | Congestive heart failure (C, N) | 1210               | 13.37          | R             |
| 5391/67/F                  | A/3B3/CS56 | Pneumonia (A, I)                | 1150               | 25.3           | L             |
| 5888/70/M                  | A          | Renal failure (C, N)            | 1215               | 17.25          | L             |
| 7610/77/F                  | 3B3/CS56   | Pneumonia (A, I)                | 1170               | 11.53          | R             |
| 7893/75/M                  | 3B3/CS56   | Sepsis (C, I)                   | 1150               | 26.83          | R             |
| 8305/33/M                  | 3B3        | Ski accident (A, N)             | 1660               | 30.58          | R             |
| Total/mean $\pm$ SD        |            |                                 |                    |                |               |
| 65.7 $\pm$ 16.3, 11 F/ 9 M |            |                                 | 1228.5 $\pm$ 179.5 | 20.0 $\pm$ 7.9 | 9 L/10 R/1 Uk |

| CONTROLS                    |          |                                |                    |                |           |
|-----------------------------|----------|--------------------------------|--------------------|----------------|-----------|
| 4354/68/F                   | A        | Coronary artery disease (A, N) | 1330               | 14.75          | R         |
| 4389/70/M                   | A        | Myocardial infarction (A, N)   | 1360               | 23.2           | R         |
| 4538/52/M                   | A        | Myocardial infarction (A, N)   | -                  | 32.1           | L         |
| 4571/71/M                   | A        | Cardiac arrest (A, N)          | 1580               | 24.0           | R         |
| 4586/37/M                   | A        | Electrocution (A, N)           | 1460               | 18.75          | R         |
| 4595/65/M                   | A        | Cardiac arrest (A, N)          | 1240               | 17.3           | R         |
| 4647/70/M                   | A        | Aortic aneurysm (A, N)         | 1400               | 17.3           | R         |
| 4625/53/F                   | A        | Cancer (C, N)                  | 1330               | 24.0           | R         |
| 4635/62/M                   | A        | Myocardial infarction (A, N)   | 1300               | 29.2           | R         |
| 5058/85/M                   | A        | Cancer (C, N)                  | 1225               | 20.3           | L         |
| 5082/78/F                   | A        | Cancer (C, N)                  | 1100               | 23.9           | L         |
| 5113/74/F                   | A        | Cancer (C, N)                  | 1145               | 12.2           | L         |
| 6975/65/M                   | 3B3/CS56 | Myocardial infarction (A, N)   | 1390               | 19.85          | R         |
| 7063/75/F                   | 3B3/CS56 | COPD (C, N)                    | 1015               | 22.0           | L         |
| 7155/55/F                   | 3B3      | Myocardial infarction (A, N)   | 1330               | 30.92          | L         |
| 7160/75/M                   | 3B3      | Myocardial infarction (A, N)   | 1340               | 23.4           | R         |
| 7164/85/F                   | 3B3      | unknown                        | 1150               | 29.18          | L         |
| 7228/75/M                   | 3B3      | Cardiac arrest (A, N)          | 1470               | 25.43          | L         |
| 7275/65/M                   | 3B3/CS56 | Cardiac arrest (A, N)          | 1570               | 17.92          | R         |
| 7287/79/F                   | 3B3/CS56 | Respiratory failure (A, N)     | 1340               | 23.08          | L         |
| 7368/70/M                   | CS56     | unknown                        | 1660               | 25.92          | L         |
| 7508/62/M                   | CS56     | Cardiac arrest (A, N)          | 1380               | 26.07          | R         |
| 7529/61/F                   | 3B3/CS56 | Cardiac arrest (A, N)          | 1210               | 24.92          | R         |
| 7519/55/M                   | 3B3/CS56 | unknown                        | 1425               | 23.92          | L         |
| 7542/76/M                   | 3B3/CS56 | Cancer (C, N)                  | 1270               | 23.92          | L         |
| 7611/64/M                   | 3B3/CS56 | unknown                        | 1175               | 14.33          | L         |
| 7495/73/F                   | 3B3/CS56 | Cardiac arrest (A, N)          | 1180               | 26.92          | R         |
| 7170//F                     | CS56     | Cancer (C, N)                  | 1085               | 22.8           | L         |
| 7801/53/F                   | 3B3/CS56 | Cardiac arrest (A, N)          | 1390               | 34.5           | R         |
| Total/mean $\pm$ SD         |          |                                |                    |                |           |
| 67.0 $\pm$ 10.8, 12 F/ 17 M |          |                                | 1316.1 $\pm$ 154.9 | 23.2 $\pm$ 5.3 | 14 L/15 R |

**A: Aggrecan; ASCVD: atherosclerotic cardiovascular disease; A: acute, no prolonged agonal period; C: chronic, with agonal period; COPD: chronic obstructive pulmonary disease; I: infection/inflammatory condition present at time of death; N: no significant infection/inflammation present at time of death; t.i.d: time of death**
