# Supplementary material for: Aggrecan and chondroitin-6-sulfate abnormalities in schizophrenia and bipolar disorder: a postmortem study on the amygdala
Source: PubMed Central journal article supplement — Transl Psychiatry. 2015 Jan 20;5(1):e496–. doi: 10.1038/tp.2014.128 (PMC4312825; doi:10.1038/tp.2014.128), 2015-01-20
Supplement: tp2014128x4.pdf [file tp2014128x4.pdf]

**Supplementary Table 2. Sample Demographic and Descriptive Characteristics of the cohort used for real-time polymerase chain reaction**

| case          | Cause of death<br>(prolonged agonal<br>state, infection/<br>inflammation) | brain<br>weight (g) | PMI (h) | hemisphere |
|---------------|---------------------------------------------------------------------------|---------------------|---------|------------|
| SCHIZOPHRENIA |                                                                           |                     |         |            |
| 3902/83/F     | GI bleed (A, N)                                                           | 1290                | 23.3    | R          |
| 4198/46/M     | Sepsis (C, I)                                                             | 1270                | 18.5    | L          |
| 4238/26/M     | Suicide (A, N)                                                            | 1600                | 16.0    | R          |
| 6993/60/F     | Myocardial infarction,<br>(A, N)                                          | 1240                | 17.1    | R          |
| 6013/68/M     | Myocardial infarction,<br>(A, N)                                          | 1255                | 21.4    | L(PCR), R  |
| 5524/68/F     | Myocardial infarction,<br>(A, N)                                          | 1515                | 27.8    | L          |
| 6342/66/M     | Pneumonia (C, I)                                                          | 1300                | 16.5    | L          |
| 6445/69/M     | Emphysema (and<br>pneumonia) (C, I)                                       | 1255                | 16.0    | R          |
| 6494/56/M     | Myocardial infarction,<br>(A, N)                                          | 1355                | 20.1    | L          |
| 5737/85/F     | Cardiac arrest (C,<br>N.A.)                                               | 1200                | 15.7    | L          |
| 4256/46/M     | Cancer (C, N)                                                             | 1370                | 19.3    | R          |
| 5662/52/F     | Cancer (C, N.A.)                                                          | 1070                | 16.1    | L          |
| 5656/73/F     | Cancer (C, N)                                                             | 1130                | 28.8    | R          |
| 4156/44/M     | Pneumonia (C, I)                                                          | 1210                | 19.0    | L          |
| CONTROLS      |                                                                           |                     |         |            |
| 3898/78/F     | MI (A, N)                                                                 | 850                 | 14.1    | R          |
| 5637/64/M     | unknown                                                                   | 1540                | 29.6    | L          |
| 5930/86/F     | Myocardial infarction,<br>(A, N)                                          | 1440                | 6.9     | R          |
| 5498/75/M     | Cardiac arrest (A, N)                                                     | 1450                | 20.1    | R          |
| 3864/47/M     | Drowning (A, N)                                                           | 1140                | 18.8    | L          |
| 6002/42/F     | Myocardial infarction,<br>colitis (A, I)                                  | 1480                | 20.3    | R          |
| 3888/54/M     | Myocardial infarction,<br>(A, N)                                          | 1300                | 25.0    | L          |
| 6004/36/F     | Cardiac arrest (A, N)                                                     | 1390                | 18.1    | L          |
| 5985/77/M     | Cardiac arrest (A, N)                                                     | 1190                | 24.6    | R          |
| 4211/30/M     | Myocardial infarction,<br>(A, N)                                          | 1630                | 23.0    | L          |
| 4163/44/F     | Myocardial infarction,<br>(A, N)                                          | 1310                | 10.7    | L          |
| 4092/58/M     | Myocardial infarction,<br>(A, N)                                          | 1380                | 39.0    | L          |
| 3867/68/F     | Cancer (C, N)                                                             | 1310                | 11.5    | R          |
| 5531/73/M     | unknown                                                                   | 1460                | 30.3    | R          |
