# Supplementary figures and images for: Aggrecan and chondroitin-6-sulfate abnormalities in schizophrenia and bipolar disorder: a postmortem study on the amygdala
Source: PubMed Central journal article supplement — Transl Psychiatry. 2015 Jan 20;5(1):e496–. doi: 10.1038/tp.2014.128 (PMC4312825; doi:10.1038/tp.2014.128), 2015-01-20

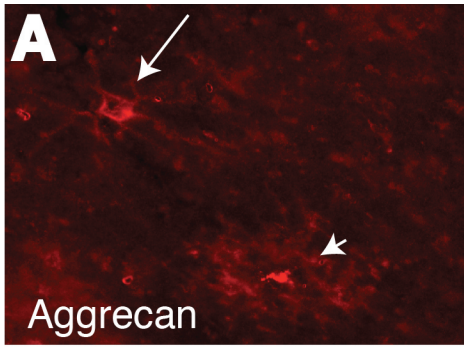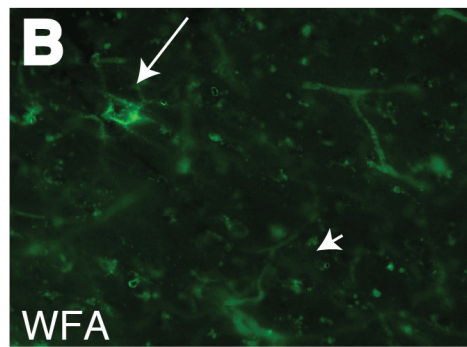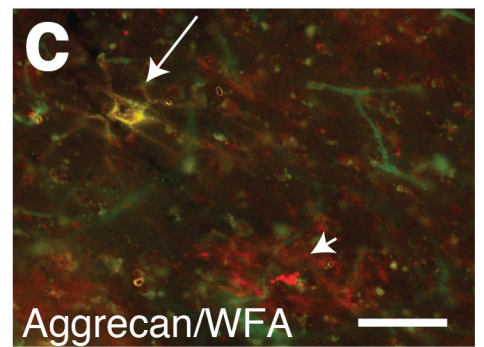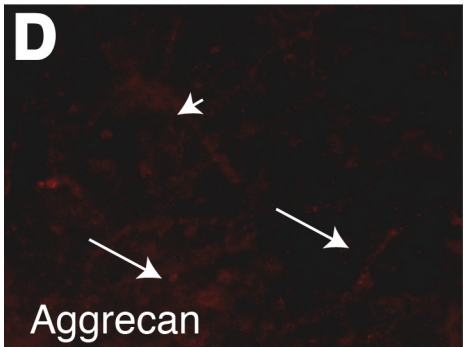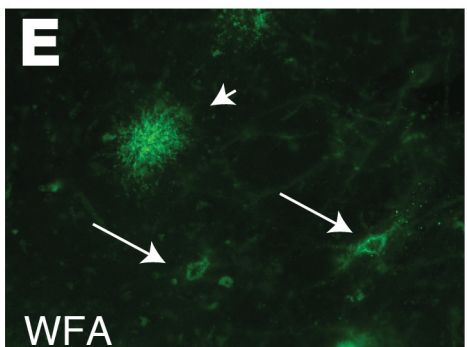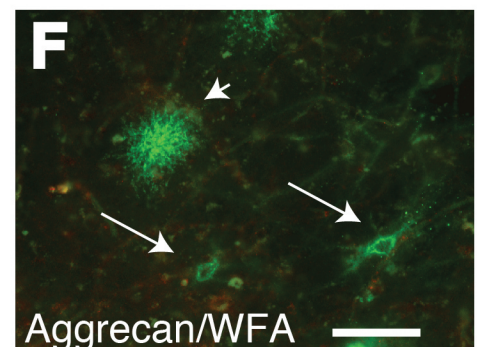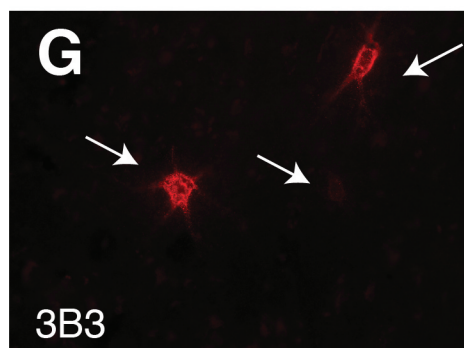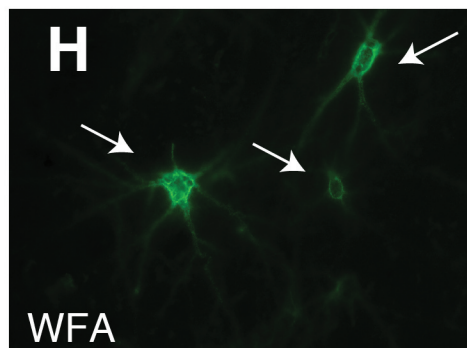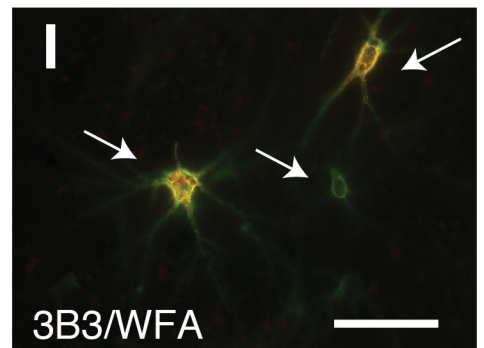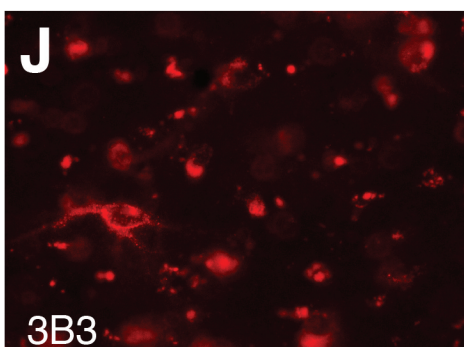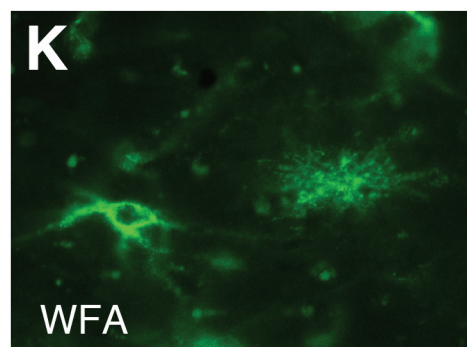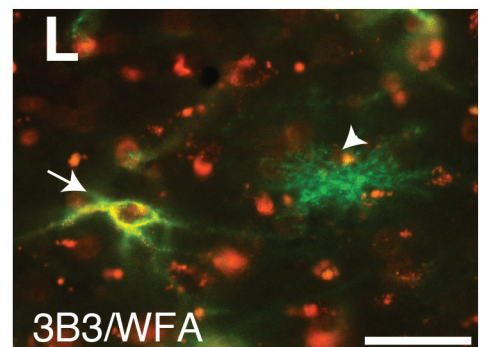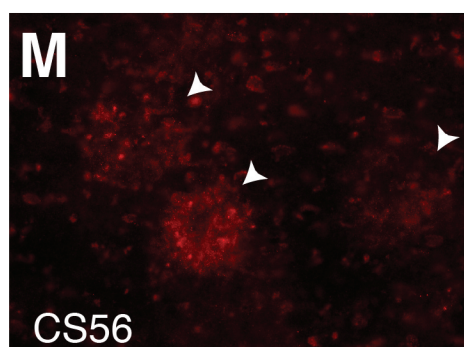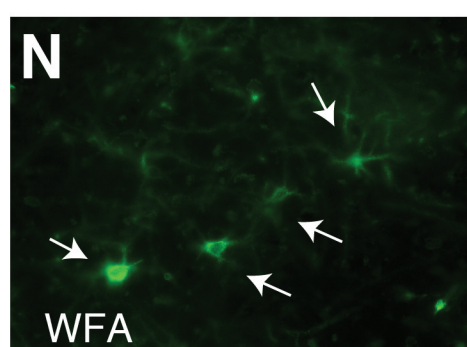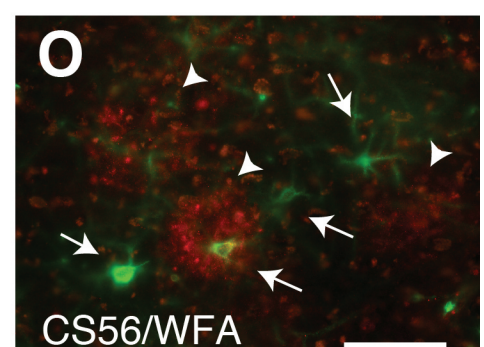

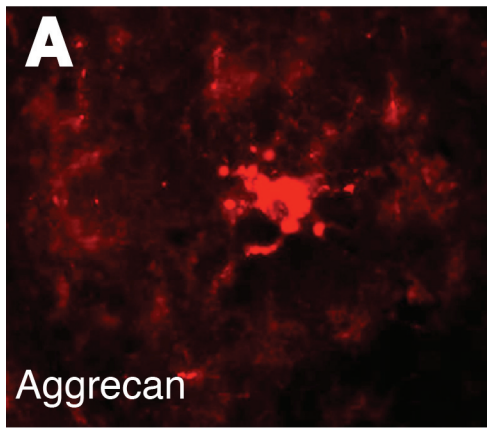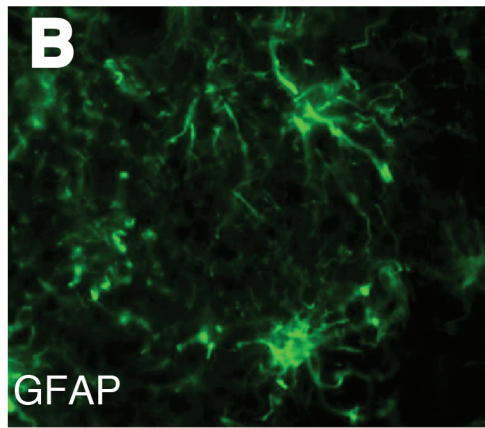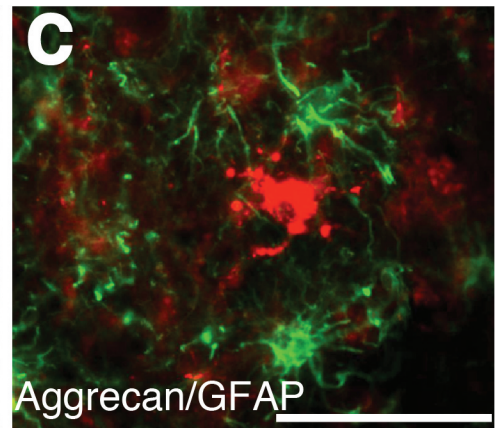



# Aggrecan mRNA

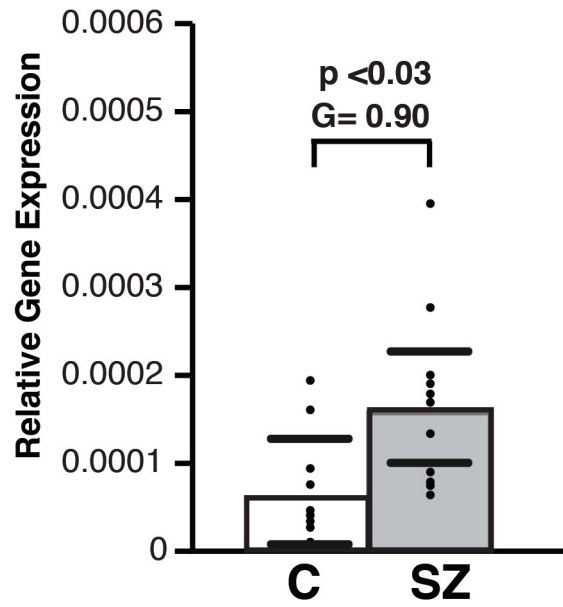

Supplement: tp2014128x2.pdf [file tp2014128x2.pdf]
